# Supplementary material
Source: Research Square preprint supplement (doi:10.21203/rs.3.rs-9348746/v1)
Supplement: Supplementary file 1 [file 3f8c4b71c68f63b6a8763cb7.pdf]

# **Bioassay-guided metabolomic profiling reveals flavanone-rich fractions as antibacterial agents in *Metrodorea nigra* (Rutaceae)**

## Authors

Rodrigo de Souza Miranda<sup>1,2</sup> ([0009-0002-0839-4836](#)), Marcos Vinicius Toledo e Silva<sup>2</sup> ([0000-0001-9105-1935](#)), Stephany Mendes Liporaci<sup>1</sup> ([0009-0000-8941-1858](#)), Ivana Correa Ramos Leal<sup>2</sup> ([0000-0002-6917-9323](#)), Roberto Carlos Campos Martins<sup>1</sup> ([0000-0002-2325-7912](#)).

## Affiliations

<sup>1</sup> Instituto de Pesquisa de Produtos Naturais Walter Mors, Universidade Federal do Rio de Janeiro, , Rio de Janeiro, RJ, Brazil.

<sup>2</sup> Departamento de Produtos Naturais e Alimentos, Faculdade de Farmácia, Universidade Federal do Rio de Janeiro, Rio de Janeiro, RJ, Brazil

Contact: Roberto Carlos Campos Martins ([roberto@ippn.ufrj.br](mailto:roberto@ippn.ufrj.br))

## **Supplementary information (SI)**

**Supplementary Table 1:** Selected ATCC strains used in antimicrobial assays

| <b>Bacterium</b>                    | <b>Strain</b> | <b>Gram</b>  | <b>Ciprofloxacin resistance</b> | <b>Oxacillin resistance</b> | <b>Methicillin resistance</b> | <b>Another antimicrobials</b>              |
|-------------------------------------|---------------|--------------|---------------------------------|-----------------------------|-------------------------------|--------------------------------------------|
| <i>Staphylococcus aureus</i>        | ATCC 33591    | Positive (+) | -/-                             | 4 µg/ml                     | Resistant                     | -/-                                        |
|                                     | ATCC 29213    |              | -/-                             | 0.5 µg/ml                   | Sensible                      | Sensible to vancomycin and ceftalorin      |
|                                     | ATCC 25923    |              | -/-                             | Sensible                    | -/-                           | -/-                                        |
| <i>Pseudomonas aeruginosa</i>       | ATCC 27853    | Negative (-) | 0.125 µg/ml                     | -/-                         | -/-                           | -/-                                        |
| <i>Staphylococcus saprophyticus</i> | ATCC 15305    | Positive (+) | -/-                             | 2 µg/ml                     | Resistant                     | -/-                                        |
| <i>Staphylococcus epidermidis</i>   | ATCC 12228    | Positive (+) | -/-                             | Sensible ≤ 0.25 µg/ml       | Sensible                      | -/-                                        |
|                                     | ATCC 35984    |              | 0,0625 µg/ml                    | 2 µg/ml                     | -/-                           | -/-                                        |
| <i>Klebsiella pneumoniae</i>        | ATCC 700603   | Negative (-) | -/-                             | -/-                         | -/-                           | Resistant to Ceftazidim and beta-lactamics |

**Supplementary Table 2:** Selected clinical strains used in antimicrobial assays

| <b>Bacterium</b>              | <b>Clinic strain</b> | <b>Gram</b>  | <b>Obtained source</b> | <b>Ciprofloxacin resistance</b> | <b>Oxacillin resistance</b> | <b>Penicillin resistance</b> |
|-------------------------------|----------------------|--------------|------------------------|---------------------------------|-----------------------------|------------------------------|
| <i>Staphylococcus aureus</i>  | 517                  | Positive (+) | Blood                  | -/-                             | Resistant                   | Resistant                    |
|                               | 664                  |              | Skin wound             | -/-                             | Resistant                   | Resistant                    |
|                               | 1025                 |              | Prosthesis             | -/-                             | Sensible                    | -/-                          |
| <i>Pseudomonas aeruginosa</i> | i059                 | Negative (-) | Catheter tip           | Sensible                        | -/-                         | -/-                          |

**Supplementary Table 3:** Molecules annotated in *M. nigra* fractions using GNPS library search tool.

| Assignment                                                                                                              | Rt (min) | Molecular Ion [M ± H] - m/z | MS/MS Fragment Ions - m/z                                         | Chemical structure                                                                   | Origin fraction                                    | Ionization Mode       | Class                  |
|-------------------------------------------------------------------------------------------------------------------------|----------|-----------------------------|-------------------------------------------------------------------|--------------------------------------------------------------------------------------|----------------------------------------------------|-----------------------|------------------------|
| 5-hydroxy-7-methoxy flavanone<br>pinostrobin<br>(5)                                                                     | 14.61    | 271.2                       | 167<br>(100%),<br>131, 103                                        | 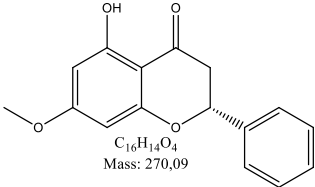   | Sp1D subfraction                                   | Positive              | Flavonoid              |
| 6,8-dihydroxy-2,2,4,4-tetramethyl-7-(3-methylbutanoyl)-9-(2-methylpropyl)-9H-xanthene-1,3-dione<br>rhodomyrthone<br>(6) | 10.49    | 441.2                       | 383, 369<br>(100%),<br>351, 335,<br>351, 233                      |    | Sp1D subfraction                                   | Negative              | Xanthone               |
| 3,5,7-trihydroxy-2-(4-hydroxyphenyl)chromen-4-one<br>kaempferol<br>(7)                                                  | 9.36     | 278.0                       | 269, 258,<br>241, 231,<br>213<br>(100%),<br>165, 153,<br>121      |   | Ethanollic Crude Extract // Ethyl acetate Fraction | Positive and negative | Flavonoid              |
| palmitoylglycerophosphocholine (8)                                                                                      | 8.27     | 496.3                       | 478<br>(100%),<br>184                                             |  | Dichloromethane fraction                           | Positive              | Fatty acid             |
| isoshaftoside (9)                                                                                                       | 8.6      | 565.0                       | 547<br>(100%),<br>529, 511,<br>499, 481,<br>445                   |  | Ethanollic Crude Extract // Ethyl acetate Fraction | Positive and negative | Glycosylated Flavonoid |
| Massbank:PR303329 NP-000004(11)<br>(10)                                                                                 | 8.6      | 565.0                       | 547<br>(100%),<br>529, 511,<br>499, 481,<br>457, 445,<br>427, 409 |  | Ethanollic crude extract                           | Positive              | Glycosylated Flavonoid |

|                                                                                                                                                                                                                                                               |       |       |                                                                                        |                                                                                                                                               |                                                                                           |          |                               |
|---------------------------------------------------------------------------------------------------------------------------------------------------------------------------------------------------------------------------------------------------------------|-------|-------|----------------------------------------------------------------------------------------|-----------------------------------------------------------------------------------------------------------------------------------------------|-------------------------------------------------------------------------------------------|----------|-------------------------------|
| <p>rutin<br/>(11)</p>                                                                                                                                                                                                                                         | 9.03  | 609.1 | 373, 367,<br>353, 343,<br>301<br>(100%),<br>271, 255                                   | 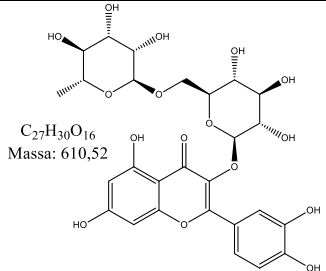 <p><math>C_{27}H_{30}O_{16}</math><br/>Massa: 610,52</p>   | Ethyl<br>acetate<br>Fraction                                                              | Negative | Glycosyla<br>ted<br>Flavonoid |
| <p>kaempferol-3-<br/>O-rutinoside<br/>(12)</p>                                                                                                                                                                                                                | 9.34  | 593.1 | 327, 285<br>(100%),<br>255                                                             |  <p><math>C_{27}H_{30}O_{15}</math><br/>Massa: 594,52</p>   | Ethyl<br>acetate<br>Fraction                                                              | Negative | Glycosyla<br>ted<br>Flavonoid |
| <p>5,7-dihydroxy-<br/>2-(4-<br/>hydroxyphenyl)<br/>-6-<br/>[(2S,3R,4R,5S,6<br/>R)-3,4,5-<br/>trihydroxy-6-<br/>(hydroxymethyl<br/>)oxan-2-yl]-8-<br/>[(2S,3R,4R,5R,<br/>6S)-3,4,5-<br/>trihydroxy-6-<br/>methyloxan-2-<br/>yl]chromen-4-<br/>one<br/>(13)</p> | 9.08  | 577.2 | 529, 503,<br>487, 473,<br>457, 413,<br>395, 383,<br>353<br>(100%),<br>325, 311,<br>297 |  <p><math>C_{27}H_{30}O_{14}</math><br/>Massa: 578,52</p>  | Ethanolic<br>Crude<br>Extract //<br>Ethyl<br>acetate<br>Fraction                          | Negative | Glycosyla<br>ted<br>Flavonoid |
| <p>5,6,2-<br/>Trimethoxyflav<br/>one<br/>(14)</p>                                                                                                                                                                                                             | 15.06 | 311.2 | 247, 239,<br>256, 197,<br>183<br>(100%),<br>170                                        |  <p><math>C_{18}H_{16}O_5</math><br/>Massa: 312,32</p>    | Ethanolic<br>Crude<br>Extract //<br>Hexane<br>Fraction //<br>Ethyl<br>acetate<br>Fraction | Negative | Flavonoid                     |
| <p>3-<br/>[(2S,3R,4S,5R,6<br/>R)-3,5-<br/>dihydroxy-6-<br/>(hydroxymethyl<br/>)-4-<br/>[(2S,3R,4R,5R,<br/>6S)-3,4,5-<br/>trihydroxy-6-<br/>methyloxan-2-<br/>yl]oxyoxan-2-<br/>yl]oxy-5,7-<br/>dihydroxy-2-(4-<br/>hydroxyphenyl)</p>                         | 9.34  | 593.1 | 593<br>(100%),<br>285, 255                                                             |  <p><math>C_{27}H_{30}O_{15}</math><br/>Massa: 594,52</p> | Ethanolic<br>Crude<br>Extract                                                             | Negative | Glycosyla<br>ted<br>Flavonoid |

|                                                              |       |       |                                                         |                                                                                                                                                        |                          |          |                        |
|--------------------------------------------------------------|-------|-------|---------------------------------------------------------|--------------------------------------------------------------------------------------------------------------------------------------------------------|--------------------------|----------|------------------------|
| chromen-4-one<br>(15)                                        |       |       |                                                         |                                                                                                                                                        |                          |          |                        |
| quercetin-3-O-deoxyhexosyl(1-2)pentoside<br>(16)             | 9.18  | 579.1 | 489, 475, 458, 433, 415, 384, 354, 300 (100%), 271, 255 | 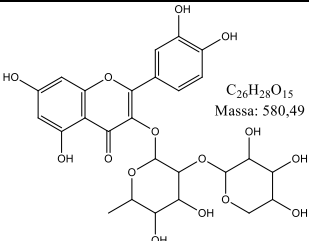 <p>C<sub>26</sub>H<sub>28</sub>O<sub>15</sub><br/>Massa: 580,49</p> | Ethyl acetate Fraction   | Negative | Glycosylated Flavonoid |
| PR309043<br>Flavanone base + 4O, 2 Prenylgancaonin E<br>(17) | 14.36 | 423.1 | 423 (100%), 381, 219, 203, 148                          |  <p>C<sub>25</sub>H<sub>28</sub>O<sub>6</sub><br/>Massa: 424,49</p>  | Ethanollic Crude Extract | Negative | Flavonoid              |

**Supplementary Table 4:** Results of DPPH and ABTS antioxidant assays for *M. nigra* samples

| <i>Metrodorea Nigra</i>         | DPPH<br>CE <sub>50</sub> (µg/ml) | ABTS – 414nm<br>CE <sub>50</sub> (µg/ml) |
|---------------------------------|----------------------------------|------------------------------------------|
| <b>Rutin (pattern)</b>          | 9.3506 ± 0.3997                  | 14.3942 ± 0.1352                         |
| <b>Ethanollic crude extract</b> |                                  |                                          |
| <b>MnBF1</b>                    | 6.0759 ± 0.9013                  | 5.1403 ± 0.1178                          |
| <b>Fractions</b>                |                                  |                                          |
| <b>Hexane fraction</b>          | 153.3310 ± 1.2086                | 37.7818 ± 3.5414                         |
| <b>Dicloromethane Fraction</b>  | 6.7859 ± 1.8010                  | 2.7573 ± 0.0302                          |
| <b>Ethyl Acetate Fraction</b>   | 11.3663 ± 1.3203                 | 7.9818 ± 0.3250                          |
| <b>Sp1D Subfraction</b>         | 12.0350 ± 0.3012                 | 2.4190 ± 0.0653                          |

**Supplementary Table 5:** Frap antioxidant assay results

| <i>M. nigra</i>       | Sample (µmol de Fe+2/g of sample) |               |                |                |                |
|-----------------------|-----------------------------------|---------------|----------------|----------------|----------------|
| Concentration (µg/ml) | MnBF1                             | P1A           | P1B            | P1C            | Sp1D           |
| <b>200</b>            | 5432.8 ± 305.7                    | 1786.9 ± 51.4 | 3200.8 ± 234.6 | 3670.3 ± 186.4 | 3818.9 ± 33.9  |
| <b>100</b>            | 3571.7 ± 356.3                    | 1241.1 ± 12.0 | 2484.2 ± 74.1  | 2678.6 ± 113.1 | 2849.4 ± 188.2 |
| <b>50</b>             | 2381.4 ± 32.3                     | 1042.5 ± 8.3  | 2049.4 ± 25.0  | 2055.0 ± 75.8  | 2175.8 ± 142.0 |
